# Supplementary material for: Health economic evaluation of self-injection of biologics in patients with rheumatoid arthritis using a Japanese real-world web-based survey
Source: Research Square preprint supplement (doi:10.21203/rs.3.rs-6034350/v1), 2025-04-17
Supplement: Supplementary file 1 [file e22bb1a8f54c5a7487bb9bae.xlsx]

## Sheet: English
	No.	Survey variables	Survey options	References
	1	The following questions include inquiries about sensitive topics such as symptoms, illnesses, and caregiving. This survey does not intend to identify individuals in any way. The collected responses will be processed statistically. If you agree with the purpose of this survey, please proceed.	Agree
			Disagree
	2	How long have you been diagnosed with rheumatoid arthritis by your doctor? Please specify the duration, even if it is approximate.	Enter the appropriate value
			I don't know
			Not diagnosed
	3	Please indicate your gender.	Male
			Female
	4	Please indicate your age.	Enter the appropriate value
	5	Have you experienced any of the following conditions or symptoms in the past year, aside from rheumatoid arthritis? Additionally, have you been hospitalized or received outpatient care? Please select all that apply.	Designated intractable disease (as per intractable disease criteria)
			Cancer
			Diabetes mellitus
			Viral hepatitis (e.g., hepatitis B, hepatitis C)
			Hypertension
			Dyslipidemia (elevated cholesterol or abnormal triglyceride levels)
			Depression
			Atopic dermatitis
			Bronchial asthma (respiratory disease)
			Perennial allergic rhinitis
			Gastritis
			Novel coronavirus infection (COVID-19)
			Other diseases or symptoms not listed above
			None of the above
	6	Japanese version of the Stanford Health Assessment Questionnaire (J-HAQ) Refer to the prior research article for the content of the questions.	-	[11]
	7	Which of the following best describes your occupation?	Permanent employment (including the following occupations): Regular employee at a company Manager at a company Company executive or senior management Civil servant, faculty member, or nonprofit organization staff Self-employed (small business owner or service provider) Specialist (e.g., legal professionals such as attorneys or tax accountants) Professional (e.g., medical professionals such as phy…
			Temporary employment (including the following occupations): Temporary or contract employee Part-time or casual worker
			Unemployed (including the following occupations): Full-time homemaker Student Unemployed Retired
	8	Work productivity and activity impairment (WPAI) Refer to the prior research article for the content of the questions.	-	[12]
	9	Please provide your individual annual income. Select your income range from the options below.	Less than 6,897 USD
			6,897 USD to less than 10,345 USD
			10,345 USD to less than 13,793 USD
			13,793 USD to less than 17,241 USD
			17,241 USD to less than 20,690 USD
			20,690 USD to less than 27,586 USD
			27,586 USD to less than 34,483 USD
			34,483 USD to less than 41,379 USD
			41,379 USD to less than 48,276 USD
			48,276 USD to less than 55,172 USD
			55,172 USD to less than 62,069 USD
			62,069 USD to less than 68,966 USD
			68,966 USD to less than 82,759 USD
			82,759 USD to less than 103,448 USD
			103,448 USD to less than 137,931 USD
			137,931 USD to less than 172,414 USD
			172,414 USD to less than 206,897 USD
			206,897 USD or more
			No income / I don't know
			I prefer not to answer
	10	Please provide your household income. Select your income range from the options below.	Less than 6,897 USD
			6,897 USD to less than 10,345 USD
			10,345 USD to less than 13,793 USD
			13,793 USD to less than 17,241 USD
			17,241 USD to less than 20,690 USD
			20,690 USD to less than 27,586 USD
			27,586 USD to less than 34,483 USD
			34,483 USD to less than 41,379 USD
			41,379 USD to less than 48,276 USD
			48,276 USD to less than 55,172 USD
			55,172 USD to less than 62,069 USD
			62,069 USD to less than 68,966 USD
			68,966 USD to less than 82,759 USD
			82,759 USD to less than 103,448 USD
			103,448 USD to less than 137,931 USD
			137,931 USD to less than 172,414 USD
			172,414 USD to less than 206,897 USD
			206,897 USD or more
			No income / I don't know
			I prefer not to answer
	11*	Over the past year, what percentage of your total medical expenses for hospitalization or outpatient treatment did you personally pay after public insurance coverage?	30%
			20%
			10%
			0%
			I don't know / I don't remember
	12	Please indicate which medications are currently prescribed for your rheumatoid arthritis treatment. Select all that apply.	List of medications for RA
	13	For the treatment of rheumatoid arthritis, you will be asked whether you have been prescribed an injectable medication (administered by a doctor or nurse, or self-administered). Please indicate the medications you are currently prescribed. Select all that apply.	List of medications for RA
	14	Please select the medical department where you are currently hospitalized or receiving outpatient treatment for rheumatoid arthritis. Select all that apply.	List of medical departments
	15	How long does it take you to travel to a healthcare facility? Select your travel range from the options below.	Less than 30 minutes
			30 minutes to less than 1 hour
			1 hour to less than 1 hour 30 minutes
			1 hour 30 minutes to less than 2 hours
			2 hours to less than 2 hours 30 minutes
			2 hours 30 minutes to less than 3 hours
			3 hours to less than 3 hours 30 minutes
			3 hours 30 minutes to less than 4 hours
			4 hours to less than 4 hours 30 minutes
			4 hours 30 minutes to less than 5 hours
			5 hours or more
	16**	Did someone accompany you to the hospital?	Yes
			No
	17	Please provide the travel costs for a single hospital visit.	Enter the appropriate value
	18	How frequently do you visit the hospital for treatment? Select your frequency of hospital visits from the options below.	Once a year
			Once every six months
			Once every 5 months
			Once every 4 months
			Once every 3 months
			Once every 2 months
			Once a month
			Once every 3 weeks
			Once every 2 weeks
			Once a week
			More than twice a week
	19	What are your out-of-pocket medical expenses for a single hospital visit? Select your out-of-pocket medical expenses for a single hospital visit from the options below.	Less than 35 USD
			35 USD to less than 69 USD
			69 USD to less than 103 USD
			103 USD to less than 138 USD
			138 USD to less than 172 USD
			172 USD to less than 207 USD
			207 USD to less than 276 USD
			276 USD to less than 345 USD
			345 USD to less than 690 USD
			690 USD or more
	20	How much time do you take off from work or school each month for rheumatoid arthritis-related visits?	All days off
			Leaving early or arriving late by less than one hour
			Leaving early or arriving late by one to less than two hours
			Leaving early or arriving late by two to less than three hours
			Leaving early or arriving late by three to less than four hours
			Leaving early or arriving late by four to less than five hours
			Leaving early or arriving late by five hours or more
			No absences
	21	If you self-administer medication by injection, how satisfied are you with the experience?	Very satisfied
			Somewhat satisfied
			Neutral
			Somewhat dissatisfied
			Very dissatisfied
	22***	Regarding future treatment methods, what are your preferences?	I would like to continue self-injection (SI)
			I would prefer to switch to another method of administration
			I am unsure
	23****	Who actually administers your self-injections?	Yourself
			Your family
			Home health nurse
			Other person
	24*****	How do you feel about administering self-injections?	Very easy
			Somewhat easy
			Neutral
			Somewhat difficult
			Very difficult
	25	If you are not currently using self-injection, please indicate all the reasons why.	I was unaware of self-injection (SI)
			I knew about SI but did not receive information from my doctor
			I have used SI in the past but no longer do so
			I have difficulty performing SI due to deformed joints
			I have a negative impression of SI
			Other reasons
		This questionnaire was originally conducted in Japanese and translated into English.
	*	This is a questionnaire regarding coinsurance.
	**	This is a questionnaire regarding chaperone.
	***	This is a questionnaire regarding continuity.
	****	This is a questionnaire regarding implementer.
	*****	This is a questionnaire regarding ease of use.
